# Supplementary material for: Structural diversity in conducting bilayer salts (CNB-EDT-TTF)4A
Source: Royal Society of Chemistry journal article supplement (doi:10.1039/d0ce01433h), 2020-01-01
Supplement: d0ce01433h1.pdf [file d0ce01433h1.pdf]

## Supplementary Material for

### Structural diversity in conducting bilayer salts (CNB-EDT-TTF)<sub>4</sub>A

Isabel. C. Santos,<sup>a</sup> Vasco Gama,<sup>a</sup> Sandra Rabaça,<sup>\*a</sup> Luís F. Veiros,<sup>b</sup> Fernando Nogueira,<sup>c</sup> José A. Paixão,<sup>c</sup> Manuel Almeida,<sup>\*a</sup>

a - C<sup>2</sup>TN and DECN, IST, Universidade de Lisboa, E.N. 10, 2695-066 Bobadela LRS, Portugal

b - CQE and DEQ, IST, Universidade de Lisboa, Av. Rovisco Pais, 1049-001, Lisboa, Portugal.

c - CFisUC, Departamento de Física – Universidade de Coimbra, Coimbra, Portugal.

#### Experimental

##### Synthesis and Electrochemical Crystallization

(CNB-EDT-TTF)<sub>4</sub>AuI<sub>2</sub>, (CNB-EDT-TTF)<sub>4</sub>I<sub>2</sub>Br, and (CNB-EDT-TTF)<sub>4</sub>AsF<sub>6</sub> charge transfer salts were prepared as small single crystals following the previously described procedures to prepare other compounds in this family.<sup>1</sup> A dichloromethane solution of the donor CNB-EDT-TTF and the corresponding anion salt *n*-Bu<sub>4</sub>NAuI<sub>2</sub>, *n*-Bu<sub>4</sub>NI<sub>2</sub>Br, or *n*-Bu<sub>4</sub>NAsF<sub>6</sub>, respectively, was added to an H shaped two-compartment cells that were separated by frit glass with Pt electrodes and sealed under nitrogen. In a first stage, a current density of approximately 0.5 μA/cm<sup>2</sup> was applied (during the first five days) until the first crystals become clearly visible growing on the anode. Subsequently, the current was raised to ~1 μA/cm<sup>2</sup> for another two weeks. The black elongated plate shaped crystals that grew on the electrode were collected and washed with dichloromethane.

##### X-ray crystallography

Crystals suitable for X-ray diffraction study were mounted on a loop with Fomblin protective oil. Data were performed with a Bruker APEX II CCD detector diffractometer at 150K, using graphite monochromated MoK $\alpha$  radiation ( $\lambda=0.71073$  Å), in the  $\phi$  and  $\omega$  scans mode. The X-ray generator was operated at 50 kV and 30 mA, and the X-ray data collection was monitored by the APEX2 program. All data were corrected for Lorentzian polarization and absorption effects using SAINT<sup>2</sup> and SADABS<sup>3</sup> programs.

The structures were solved by direct methods using SIR97<sup>4</sup> and SHELXS-97<sup>5</sup> and refined by full matrix least-squares methods using the program SHELXL-2014<sup>6</sup> using the winGX<sup>7</sup> software package. Non-hydrogen atoms were refined with anisotropic thermal parameters whereas H-atoms were placed in idealized positions and allowed to refine riding on the parent C atom. Molecular graphics and packing

diagrams were prepared using MERCURY-4.3<sup>8</sup>. [CCDC 2018237 and 2018237] contains the supplementary crystallographic data for this paper. These data can be obtained free of charge from The Cambridge Crystallographic Data Centre via [www.ccdc.cam.ac.uk/data\\_request/cif](http://www.ccdc.cam.ac.uk/data_request/cif).

**Table S1.** Crystal data for  $\beta''$ -(CNB-EDT-TTF)<sub>4</sub>A

| <b>X</b>                                                | <b>AuI<sub>2</sub></b>                                                                          | <b>AsF<sub>6</sub></b>                                                                          |
|---------------------------------------------------------|-------------------------------------------------------------------------------------------------|-------------------------------------------------------------------------------------------------|
| Empirical formula                                       | C <sub>26</sub> H <sub>14</sub> N <sub>2</sub> O <sub>4</sub> Au <sub>0.5</sub> I <sub>12</sub> | C <sub>26</sub> H <sub>14</sub> F <sub>3</sub> N <sub>2</sub> S <sub>12</sub> As <sub>0.5</sub> |
| Formula weight                                          | 964.49                                                                                          | 833.57                                                                                          |
| Temperature (K)                                         | 150(2)                                                                                          | 150(2)                                                                                          |
| Crystal system, space group                             | Triclinic, P-1                                                                                  | Triclinic, P-1                                                                                  |
| <i>a</i> (Å)                                            | 4.8480(2)                                                                                       | 4.8398(5)                                                                                       |
| <i>b</i> (Å)                                            | 5.7558(2)                                                                                       | 5.8172(6)                                                                                       |
| <i>c</i> (Å)                                            | 27.2970(12)                                                                                     | 28.1649(17)                                                                                     |
| $\alpha$ (°)                                            | 89.436(3)                                                                                       | 90.457(6)                                                                                       |
| $\beta$ (°)                                             | 89.331(2)                                                                                       | 91.510(6)                                                                                       |
| $\gamma$ (°)                                            | 84.313(2)                                                                                       | 95.030(7)                                                                                       |
| <i>V</i> (Å <sup>3</sup> )                              | 757.87(5)                                                                                       | 789.59(13)                                                                                      |
| <i>Z</i> , <i>D</i> <sub>Cal</sub> (mg/m <sup>3</sup> ) | 1, 2.113                                                                                        | 1, 1.753                                                                                        |
| Absorption coeff. $\mu$ (mm <sup>-1</sup> )             | 4.316                                                                                           | 1.393                                                                                           |
| Crystal size (mm)                                       | 0.20 × 0.03 × 0.02                                                                              | 0.20 × 0.04 × 0.02                                                                              |
| $\theta$ range for data collection (°)                  | 2.985 to 25.340                                                                                 | 3.516 to 25.679                                                                                 |
| Index range (h, k, l)                                   | -5/5, -6/6, -32/32                                                                              | -5/3, -7/7, -33/34                                                                              |
| Reflections collected / unique                          | 5909 / 2740 [Rint = 0.0338]                                                                     | 6264 / 2939[Rint = 0.0853]                                                                      |
| Completeness to $\theta$                                | 25.24 99.2 %                                                                                    | 25.24 98.5 %                                                                                    |
| Data / restraints / parameters                          | 2740/ 0 / 193                                                                                   | 2939 / 0 / 208                                                                                  |
| Goodness-of-fit on <i>F</i> <sup>2</sup>                | 1.158                                                                                           | 1.044                                                                                           |
| Final R indices [ <i>I</i> > 2 $\sigma$ ( <i>I</i> )]   | R1 = 0.0531, wR2 = 0.1194                                                                       | R <sub>1</sub> = 0.0934,<br>wR <sub>2</sub> = 0.2207                                            |
| Largest difference peak and hole (e Å <sup>3</sup> )    | 1.046 and -0.805                                                                                | 0.681 and -0.945                                                                                |
| CCDC reference                                          | 2018237                                                                                         | 2018238                                                                                         |

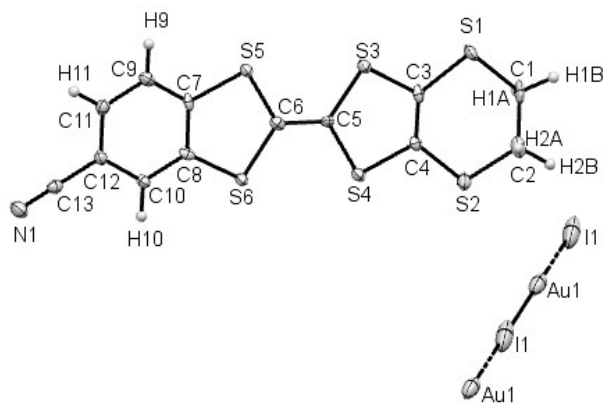

**Figure S1.** ORTEP diagram of compound  $\beta''$ -(CNB-EDT-TTF) $_4$ Au $_2$  drawn at the 50% probability level with the atomic numbering scheme.

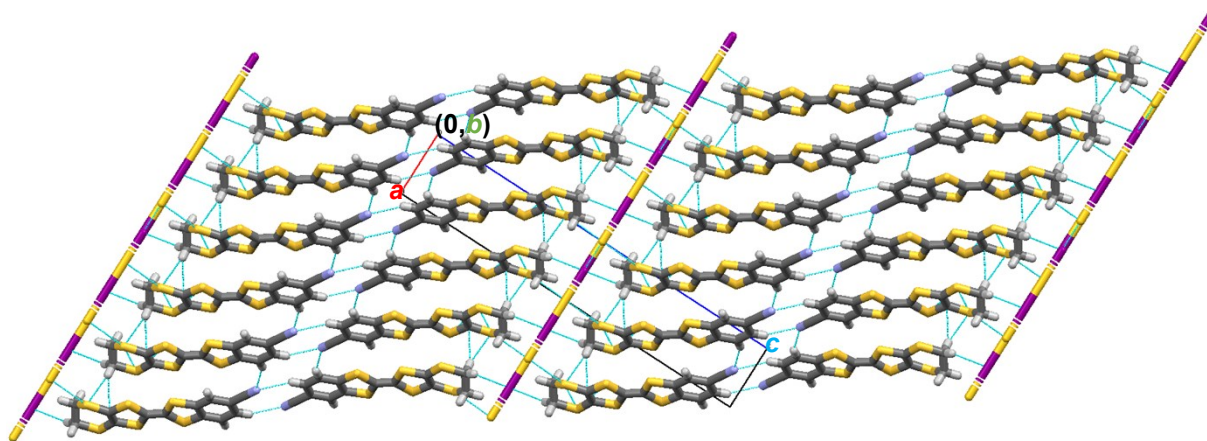

**Figure S2.** Crystal structure of  $\beta''$ -(CNB-EDT-TTF) $_4$ Au $_2$  view along the  $b$ -axis, blue lines represent short contacts.

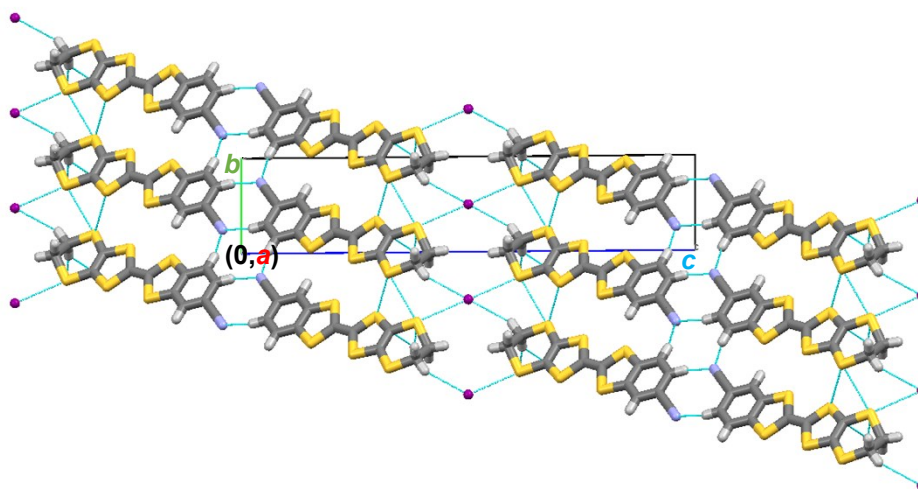

**Figure S3.** Crystal structure of  $\beta''$ -(CNB-EDT-TTF) $_4$ Au $_2$  view along the  $a$ -axis, blue lines represent short contacts.

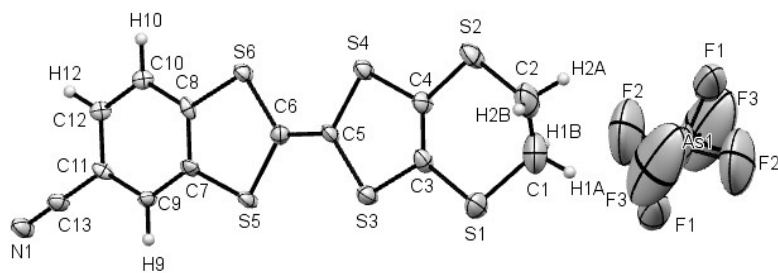

**Figure S4.** ORTEP diagram of compound  $\beta''$ -(CNB-EDT-TTF)<sub>4</sub>AsF<sub>6</sub> drawn at the 50% probability level with the atomic numbering scheme.

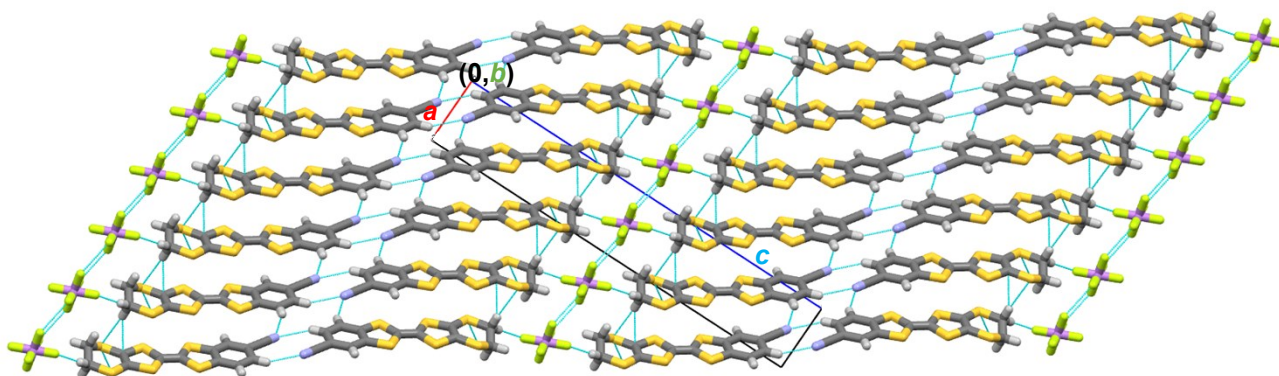

**Figure S5.** Crystal structure of  $\beta''$ -(CNB-EDT-TTF)<sub>4</sub>AsF<sub>6</sub> view along the *b*-axis, blue lines represent short contacts.

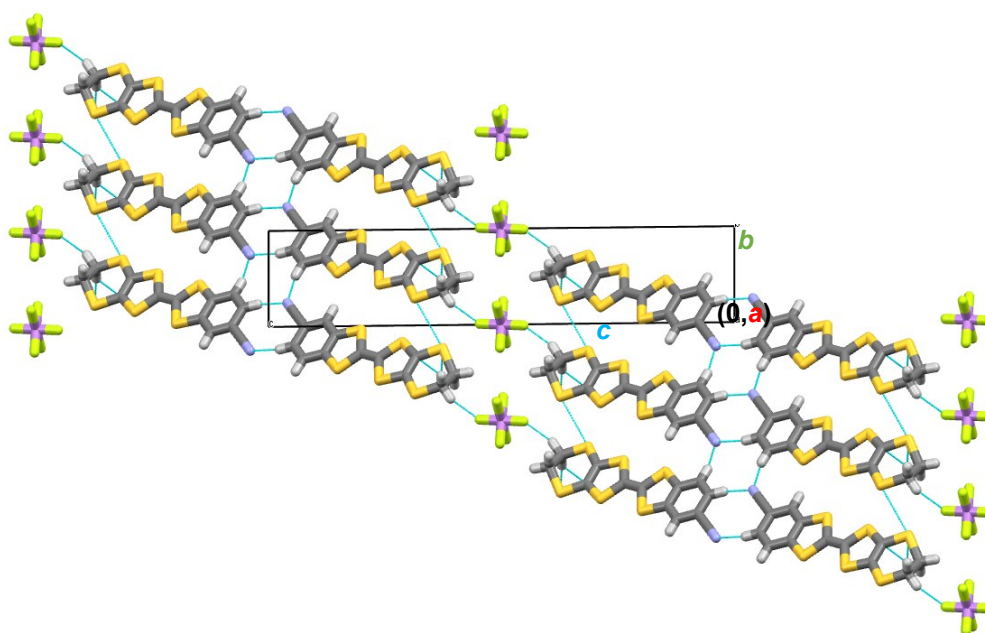

**Figure S6.** Crystal structure of  $\beta''$ -(CNB-EDT-TTF)<sub>4</sub>AsF<sub>6</sub> view along the *a*-axis, blue lines represent short contacts.

## Computational Details

**Molecular conformation** calculations were performed using the GAUSSIAN 09 software package<sup>9</sup> without symmetry constraints. The optimized geometries were obtained with the the PBE0 functional and a standard 6-31G(d,p) basis set.<sup>10</sup> That functional uses a hybrid generalized gradient approximation (GGA), including 25 % mixture of Hartree-Fock<sup>11</sup> exchange with DFT<sup>12</sup> exchange-correlation, given by Perdew, Burke and Ernzerhof functional (PBE).<sup>13</sup> Frequency calculations were performed showing no imaginary modes and confirming the stationary points as minima. The electronic energies ( $E_{b1}$ ) were converted to enthalpy at 298.15 K and 1 atm ( $H_{b1}$ ) by using zero point energy and thermal energy corrections based on structural and vibration frequency data calculated at the same level.

Single point energy calculations were performed on the geometries optimized at the PBE0/6-31G(d,p) level, using the M06-2X functional and a standard 6-311++G(d,p) basis set.<sup>14</sup> The M06-2X functional is a hybrid meta-GGA functional developed by Truhlar and Zhao,<sup>15</sup> and it was shown to perform very well for main group element systems, providing a good description of weak and long range interactions.<sup>16</sup> The enthalpy values presented ( $H_{b2}$ ) were derived from the electronic energy values obtained at the M06-2X/6-311++G(d,p)//PBE0/6-31G(d,p) level ( $E_{b2}$ ) according to the following expression:  $H_{b2} = E_{b2} + H_{b1} - E_{b1}$ .

**Table S2.** Atomic coordinates of the optimized geometries (PBE0/6-31G\*\*)

|                                               |            |           |            |           |           |           |            |
|-----------------------------------------------|------------|-----------|------------|-----------|-----------|-----------|------------|
| <b>CNB-EDT-TTF</b>                            |            |           | H          | 10.303646 | -2.347050 | -9.822080 |            |
| S                                             | -1.666666  | 0.712837  | 0.470703   | H         | 8.835955  | -2.082066 | -11.729060 |
| S                                             | -0.484384  | -1.572603 | 1.943678   | H         | 7.569355  | -3.089666 | -11.000054 |
| S                                             | 0.326422   | 0.095077  | -2.061589  | H         | -2.973705 | 3.132715  | 1.886221   |
| S                                             | 1.485298   | -2.183419 | -0.600524  | H         | -1.416874 | 1.558782  | 0.764717   |
| S                                             | 2.716747   | 0.350689  | -3.900802  | H         | -1.060929 | -0.702473 | 4.415865   |
| S                                             | 4.065101   | -2.171916 | -2.083119  | H         | 1.060341  | 0.702719  | -4.416247  |
| N                                             | -4.193909  | 3.316792  | 5.554754   | H         | 2.973031  | -3.132533 | -1.886635  |
| C                                             | -0.477906  | -0.591385 | 0.475996   | H         | 1.416192  | -1.558607 | -0.765134  |
| C                                             | -1.909211  | 0.692657  | 2.212973   | S         | 2.782784  | -0.918388 | -6.196857  |
| C                                             | -1.351614  | -0.391113 | 2.908028   | S         | 3.923191  | -3.195779 | -4.678706  |
| C                                             | -2.642538  | 1.656589  | 2.890032   | S         | 5.075518  | -1.333841 | -8.511246  |
| H                                             | -3.071223  | 2.502512  | 2.363460   | S         | 6.191222  | -3.602686 | -7.001625  |
| C                                             | -1.530345  | -0.510649 | 4.284668   | S         | 7.643803  | -0.886727 | -10.055743 |
| H                                             | -1.091716  | -1.345007 | 4.822332   | S         | 8.919075  | -3.387832 | -8.175947  |
| C                                             | -2.824542  | 1.528792  | 4.272962   | N         | -0.469408 | 1.309949  | -1.359050  |
| C                                             | -2.268135  | 0.446162  | 4.966365   | C         | 4.035039  | -2.157655 | -6.102011  |
| H                                             | -2.412847  | 0.363960  | 6.037822   | C         | 2.340562  | -1.029500 | -4.496937  |
| C                                             | -3.579668  | 2.516189  | 4.979214   | C         | 2.878406  | -2.109504 | -3.780706  |
| C                                             | 0.335719   | -0.844168 | -0.569107  | C         | 1.476541  | -0.140442 | -3.875249  |
| C                                             | 1.968081   | -0.386374 | -2.503201  | C         | 2.549547  | -2.300806 | -2.440382  |
| C                                             | 2.500730   | -1.430581 | -1.836874  | C         | 1.146375  | -0.343449 | -2.528650  |
| C                                             | 3.303761   | -1.206843 | -4.646511  | C         | 1.680873  | -1.421305 | -1.809786  |
| H                                             | 2.445477   | -1.874958 | -4.754113  | C         | 0.255455  | 0.568038  | -1.881713  |
| H                                             | 3.670476   | -0.949579 | -5.645010  | C         | 4.971486  | -2.327346 | -7.057306  |
| C                                             | 4.425329   | -1.850836 | -3.859809  | C         | 6.781556  | -1.709136 | -8.776295  |
| H                                             | 5.314263   | -1.217058 | -3.884127  | C         | 7.294583  | -2.748423 | -8.086910  |
| H                                             | 4.672798   | -2.822265 | -4.300704  | C         | 8.379927  | -2.389438 | -10.782879 |
|                                               |            |           |            | C         | 9.441456  | -3.012566 | -9.901810  |
| <b>R<sup>2</sup><sub>z</sub>(10) synthons</b> |            |           | S          | -2.783347 | 0.918654  | 6.196481  |            |
| H                                             | -10.304091 | 2.347376  | 9.821919   | S         | -3.923806 | 3.196007  | 4.678311   |
| H                                             | -9.769317  | 3.962914  | 10.337040  | S         | -5.076010 | 1.334148  | 8.510926   |
| H                                             | -7.569761  | 3.090020  | 10.999786  | S         | -6.191770 | 3.602957  | 7.001292   |
| H                                             | -8.836334  | 2.082432  | 11.728855  | S         | -7.644239 | 0.887061  | 10.055521  |
| H                                             | 9.768886   | -3.962577 | -10.337249 | S         | -8.919579 | 3.388132  | 8.175720   |

|   |           |           |           |   |           |           |            |
|---|-----------|-----------|-----------|---|-----------|-----------|------------|
| N | 0.468769  | -1.309744 | 1.358655  | C | 5.002337  | 0.407334  | -11.356979 |
| C | -4.035611 | 2.157912  | 6.101641  | C | 6.043660  | -0.387626 | -10.598780 |
| C | -2.341164 | 1.029737  | 4.496550  | S | 5.519533  | -3.642191 | -6.141289  |
| C | -2.879032 | 2.109723  | 3.780309  | S | 6.304878  | -6.188732 | -4.836706  |
| C | -1.477149 | 0.140675  | 3.874861  | S | 8.082086  | -3.923938 | -8.183130  |
| C | -2.550203 | 2.301002  | 2.439974  | S | 8.830320  | -6.460614 | -6.891850  |
| C | -1.147012 | 0.343658  | 2.528250  | S | 10.863532 | -3.463194 | -9.282852  |
| C | -1.681535 | 1.421496  | 1.809377  | S | 11.706055 | -6.310712 | -7.632846  |
| C | -0.256097 | -0.567833 | 1.881314  | N | 1.670865  | -1.910014 | -1.557069  |
| C | -4.972029 | 2.327621  | 7.056961  | C | 6.668157  | -4.978763 | -6.069755  |
| C | -6.782039 | 1.709446  | 8.776025  | C | 4.822649  | -3.963470 | -4.558417  |
| C | -7.295091 | 2.748718  | 8.086637  | C | 5.192357  | -5.169199 | -3.943136  |
| C | -8.380340 | 2.389786  | 10.782652 | C | 3.918350  | -3.112225 | -3.940864  |
| C | -9.441900 | 3.012896  | 9.901608  | C | 4.658972  | -5.524701 | -2.705862  |

**R<sup>2</sup><sub>4</sub>(10) synthons**

|   |            |           |            |   |            |           |            |
|---|------------|-----------|------------|---|------------|-----------|------------|
| H | -10.859976 | 5.511700  | 10.532631  | C | 3.748232   | -4.685393 | -2.080493  |
| H | -12.263857 | 4.489488  | 10.903982  | C | 2.439416   | -2.617051 | -2.065566  |
| H | -13.376519 | 5.082840  | 8.828787   | C | 7.712928   | -5.093646 | -6.914598  |
| H | -12.913885 | 6.576749  | 9.674218   | C | 9.783560   | -4.393202 | -8.268604  |
| H | 5.411100   | 0.696027  | -12.330262 | C | 10.130024  | -5.553795 | -7.676352  |
| H | 4.090026   | -0.171475 | -11.521925 | C | 11.647771  | -4.894881 | -10.095256 |
| H | 6.203188   | -1.351955 | -11.092813 | C | 12.529636  | -5.690864 | -9.157084  |
| H | 6.990689   | 0.155763  | -10.575623 | S | -5.520256  | 3.642947  | 6.141221   |
| H | -6.991261  | -0.154605 | 10.575503  | S | -6.305617  | 6.189505  | 4.836682   |
| H | -6.203757  | 1.353104  | 11.092716  | S | -8.082999  | 3.924475  | 8.182857   |
| H | -4.090627  | 0.172597  | 11.521904  | S | -8.831260  | 6.461163  | 6.891618   |
| H | -5.411739  | -0.694887 | 12.330197  | S | -10.864540 | 3.463480  | 9.282234   |
| H | 12.912591  | -6.576640 | -9.674931  | S | -11.707070 | 6.311024  | 7.632271   |
| H | 13.375448  | -5.082721 | -8.829638  | N | -1.671332  | 1.911018  | 1.557130   |
| H | 12.262567  | -4.489391 | -10.904722 | C | -6.668934  | 4.979472  | 6.069658   |
| H | 10.858656  | -5.511478 | -10.533141 | C | -4.823291  | 3.964308  | 4.558400   |
| H | -3.329033  | 4.948267  | 1.113276   | C | -5.193005  | 5.170046  | 3.943141   |
| H | -4.956232  | 6.453685  | 2.228134   | C | -3.918934  | 3.113112  | 3.940866   |
| H | -3.630874  | 2.173979  | 4.403138   | C | -4.659564  | 5.525608  | 2.705908   |
| H | -1.199879  | 4.190110  | -4.233314  | C | -3.380452  | 3.484889  | 2.701445   |
| H | 0.401100   | 0.030777  | -2.003293  | C | -3.748768  | 4.686349  | 2.080556   |
| H | -0.823499  | 1.760300  | -0.696706  | C | -2.439901  | 2.618039  | 2.065619   |
| H | -0.401547  | -0.029752 | 2.003365   | C | -7.713785  | 5.094263  | 6.914414   |
| H | 0.823051   | -1.759289 | 0.696784   | C | -9.784515  | 4.393619  | 8.268163   |
| H | 1.199400   | -4.189081 | 4.233411   | C | -10.130991 | 5.554218  | 7.675928   |
| H | 3.630290   | -2.173102 | -4.403157  | C | -11.648989 | 4.895066  | 10.094614  |
| H | 4.955633   | -6.452772 | -2.228072  | C | -12.530796 | 5.691031  | 9.156373   |
| H | 3.328535   | -4.947268 | -1.113185  | S | -0.113910  | -2.422117 | 6.211697   |
| S | 0.113440   | 2.423173  | -6.211612  | S | -1.056332  | 0.050503  | 4.872971   |
| S | 1.055905   | -0.049442 | -4.872906  | S | -2.077295  | -1.778883 | 8.758476   |
| S | 2.076768   | 1.779973  | -8.758425  | S | -2.998975  | 0.683560  | 7.439554   |
| S | 2.998523   | -0.682460 | -7.439535  | S | -4.538930  | -1.956902 | 10.515133  |
| S | 4.538339   | 1.958027  | -10.515164 | S | -5.628459  | 0.769956  | 8.845530   |
| S | 5.627959   | -0.768823 | -8.845607  | N | 2.348883   | -4.857446 | 1.009479   |
| N | -2.349343  | 4.858461  | -1.009379  | C | -1.174185  | -1.013538 | 6.275499   |
| C | 1.173729   | 1.014606  | -6.275432  | C | 0.182833   | -2.303723 | 4.480939   |
| C | -0.183285  | 2.304767  | -4.480853  | C | -0.263387  | -1.134499 | 3.847124   |
| C | 0.262950   | 1.135544  | -3.847047  | C | 0.855130   | -3.277413 | 3.756887   |
| C | -0.855592  | 3.278446  | -3.756794  | C | -0.040176  | -0.932816 | 2.486755   |
| C | 0.039739   | 0.933848  | -2.486679  | C | 1.084123   | -3.067217 | 2.390788   |
| C | -1.084582  | 3.068238  | -2.390697  | C | 0.637284   | -1.899655 | 1.757217   |
| C | -0.637728  | 1.900677  | -1.757136  | C | 1.780835   | -4.057728 | 1.631778   |
| C | -1.781319  | 4.058728  | -1.631683  | C | -1.974818  | -0.751264 | 7.328351   |
| C | 1.974346   | 0.752347  | -7.328300  | C | -3.688530  | -1.196309 | 9.190700   |
| C | 3.687995   | 1.197420  | -9.190702  | C | -4.116624  | -0.068355 | 8.588033   |
| C | 4.116123   | 0.069470  | -8.588052  | C | -5.002939  | -0.406201 | 11.356928  |
|   |            |           |            | C | -6.044226  | 0.388771  | 10.598691  |

The total electronic energies of the  $\beta''$ - and  $\kappa$ - phases were calculated using Density Functional Theory<sup>17</sup> as implemented in the VASP code<sup>18,19,20,21</sup>. We used the PBE<sup>22</sup> and SCAN<sup>23,24</sup> exchange and correlation functionals. Both functionals were used with and without the inclusion of dispersion forces through the Tkatchenko-Scheffler<sup>25</sup> method with iterative Hirshfeld partitioning<sup>26,27</sup>. For the  $\beta''$ -phase, as the number of electrons per unit cell is odd, both spin-polarized and spin-unpolarized optimizations were performed. Electron-nuclei interactions were modelled using the projector augmented wave (PAW) method<sup>28,29</sup>. Given the size of the unit cells, only the  $\Gamma$  point was used for the Brillouin zone (BZ) sampling, and the partial occupancies of each orbital were set using a gaussian smearing of 0.03 eV. Kinetic energy cutoff was set at 400 eV. Convergence was reached when total electronic changed between iterations by less than  $10^{-7}$  eV. The structural optimization process ended when atomic forces became smaller than 0.005 eV/Å.

**Table S3:** Total energies, in meV/atom, of the  $\kappa$  phase (222 atoms per unit cell) with respect to the spin-unpolarized  $\beta''$ -phase (111 atoms per unit cell).

|             | Without dispersion forces | With dispersion forces |
|-------------|---------------------------|------------------------|
| <b>PBE</b>  | 47.676                    | 52.034                 |
| <b>SCAN</b> | 55.779                    | 65.552                 |

**Table S4:** Total energy, in meV/atom, of the spin-polarized  $\beta''$ -phase with respect to the spin-unpolarized calculation.

|                         | SCAN with dispersion forces |
|-------------------------|-----------------------------|
| <b>Spin unpolarized</b> | 0                           |
| <b>Spin polarized</b>   | 0.744                       |

**Table S5:** Impact of the inclusion of dispersion effects – total energies, in meV/atom, of the dispersion corrected calculations with respect to the same calculation without any dispersion correction.

|             | $\beta''$ -phase | $\kappa$ -phase |
|-------------|------------------|-----------------|
| <b>PBE</b>  | -95.461          | -91.103         |
| <b>SCAN</b> | -109.148         | -99.375         |

**Table S6:** Experimental and calculated Lattice parameters (in Å and degrees) of the  $\beta'$ -phase using different functionals. The inclusion of dispersion forces is indicated with "+VdW".

|              | PBE     | PBE+VdW | SCAN    | SCAN+VdW<br>spin-unpolarized | SCAN+VdW<br>spin-polarized | <b>Experimental</b> |
|--------------|---------|---------|---------|------------------------------|----------------------------|---------------------|
| a (Å)        | 4.7722  | 4.7750  | 4.7772  | 4.7371                       | 4.7301                     | <b>5.7669</b>       |
| b (Å)        | 9.9658  | 9.8397  | 9.8107  | 9.6577                       | 9.6531                     | <b>9.7113</b>       |
| c (Å)        | 31.0031 | 28.8154 | 28.7172 | 28.1653                      | 28.1849                    | <b>27.7724</b>      |
| $\alpha$ (°) | 85.082  | 86.712  | 84.767  | 85.756                       | 85.648                     | <b>86.793</b>       |
| $\beta$ (°)  | 95.925  | 93.856  | 93.395  | 93.287                       | 93.349                     | <b>89.079</b>       |
| $\gamma$ (°) | 81.442  | 80.901  | 80.830  | 80.702                       | 80.582                     | <b>84.558</b>       |

**Table S7:** Experimental and calculated Lattice parameters (in Å and degrees) of the  $\kappa$ -phase using different functionals. The inclusion of dispersion forces is indicated with "+VdW".

|              | PBE     | PBE+VdW | SCAN    | SCAN+VdW | <b>Experimental</b> |
|--------------|---------|---------|---------|----------|---------------------|
| a (Å)        | 28.0853 | 27.8071 | 27.6087 | 27.3702  | <b>27.9810</b>      |
| b (Å)        | 8.3129  | 8.0135  | 7.9443  | 7.7862   | <b>8.1197</b>       |
| c (Å)        | 13.6140 | 13.3005 | 13.3048 | 13.0584  | <b>13.6070</b>      |
| $\alpha$ (°) | 90.000  | 90.000  | 90.000  | 90.000   | <b>90.000</b>       |
| $\beta$ (°)  | 96.450  | 97.818  | 98.123  | 98.938   | <b>96.908</b>       |
| $\gamma$ (°) | 90.000  | 90.000  | 90.000  | 90.000   | <b>90.000</b>       |



**Table S8.** Bond lengths (Å) of the (CNB-EDT-TTF) donor in  $\beta''$ -(CNB-EDT-TTF)<sub>4</sub>I<sub>3</sub> and  $\kappa''$ -(CNB-EDT-TTF)<sub>4</sub>I<sub>3</sub> compounds, experimental and optimized values.

| 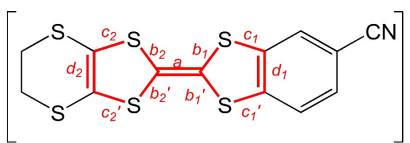 $z$ |      | a (Å)   | b1 (Å)   | b1' (Å)  | b2 (Å)   | b2' (Å)  | c1 (Å)   | c1' (Å)  | c2 (Å)   | c2' (Å)  | d1 (Å)  | d2 (Å)  | $\delta=(b+c)-(a+d)$ |
|---------------------------------------------------------------------------------------|------|---------|----------|----------|----------|----------|----------|----------|----------|----------|---------|---------|----------------------|
| $\beta''_{To}$ -(CNB-EDT-TTF) <sub>4</sub> I <sub>3</sub><br>(Experimental)           | I    | 1.37(1) | 1.749(9) | 1.749(9) | 1.751(9) | 1.735(9) | 1.742(9) | 1.741(9) | 1.746(9) | 1.766(9) | 1.41(1) | 1.36(1) | 0.740                |
|                                                                                       | II   | 1.35(1) | 1.757(9) | 1.756(9) | 1.748(9) | 1.75(1)  | 1.742(9) | 1.76(1)  | 1.76(1)  | 1.767(9) | 1.41(1) | 1.35(1) | 0.780                |
| $\beta''_{To}$ -(CNB-EDT-TTF) <sub>4</sub> I <sub>3</sub><br>(spin.unpolarized)       | I    | 1.3736  | 1.7294   | 1.7388   | 1.7225   | 1.7329   | 1.7475   | 1.7013   | 1.7374   | 1.7572   | 1.3895  | 1.3642  | 0.7163               |
|                                                                                       | II   | 1.3737  | 1.7299   | 1.7398   | 1.7238   | 1.7328   | 1.7328   | 1.7008   | 1.7384   | 1.7573   | 1.3891  | 1.3649  | 0.7132               |
|                                                                                       | III  | 1.3737  | 1.7299   | 1.7398   | 1.7238   | 1.7328   | 1.7469   | 1.7008   | 1.7384   | 1.7573   | 1.3891  | 1.3649  | 0.716725             |
|                                                                                       | IV   | 1.3736  | 1.7294   | 1.7388   | 1.7225   | 1.7329   | 1.7475   | 1.7013   | 1.7374   | 1.7966   | 1.3895  | 1.3642  | 0.72615              |
| $\beta''_{To}$ -(CNB-EDT-TTF) <sub>4</sub> I <sub>3</sub><br>(spin-polarized)         | I    | 1.3737  | 1.7291   | 1.7386   | 1.7222   | 1.7328   | 1.7472   | 1.7011   | 1.7374   | 1.757    | 1.3893  | 1.3644  | 0.7158               |
|                                                                                       | II   | 1.3739  | 1.7297   | 1.7395   | 1.7235   | 1.7326   | 1.7468   | 1.7005   | 1.7384   | 1.757    | 1.3889  | 1.365   | 0.71615              |
|                                                                                       | III  | 1.3739  | 1.7297   | 1.7395   | 1.7235   | 1.7326   | 1.7468   | 1.7005   | 1.7384   | 1.757    | 1.3889  | 1.365   | 0.71615              |
|                                                                                       | IV   | 1.3737  | 1.7291   | 1.7386   | 1.7222   | 1.7328   | 1.7472   | 1.7011   | 1.7374   | 1.757    | 1.3893  | 1.3644  | 0.7158               |
| $\kappa$ -(CNB-EDT-TTF) <sub>4</sub> I <sub>3</sub><br>(Experimental)                 | I    | 1.31(3) | 1.77(2)  | 1.76(2)  | 1.75(2)  | 1.77(2)  | 1.73(2)  | 1.76(2)  | 1.74(3)  | 1.78(2)  | 1.40(3) | 1.33(3) | 0.84                 |
|                                                                                       | II   | 1.34(3) | 1.74(2)  | 1.73(2)  | 1.76(2)  | 1.76(2)  | 1.76(2)  | 1.79(2)  | 1.75(2)  | 1.77(2)  | 1.38(2) | 1.28(3) | 0.845                |
| $\kappa$ -(CNB-EDT-TTF) <sub>4</sub> I <sub>3</sub><br>(optimized)                    | I    | 1.3582  | 1.7435   | 1.7354   | 1.7321   | 1.7329   | 1.7384   | 1.7247   | 1.7391   | 1.7405   | 1.3989  | 1.3559  | 0.73605              |
|                                                                                       | II   | 1.3582  | 1.7435   | 1.7354   | 1.7321   | 1.7329   | 1.7383   | 1.7247   | 1.7391   | 1.7405   | 1.3989  | 1.3559  | 0.736025             |
|                                                                                       | III  | 1.3577  | 1.734    | 1.7372   | 1.7293   | 1.7255   | 1.728    | 1.7262   | 1.732    | 1.7356   | 1.4004  | 1.3582  | 0.72495              |
|                                                                                       | IV   | 1.3577  | 1.734    | 1.7372   | 1.7293   | 1.7255   | 1.728    | 1.7262   | 1.732    | 1.7356   | 1.4004  | 1.3582  | 0.72495              |
|                                                                                       | V    | 1.3582  | 1.7435   | 1.7354   | 1.7321   | 1.7329   | 1.7384   | 1.7247   | 1.7391   | 1.7405   | 1.3989  | 1.3559  | 0.73605              |
|                                                                                       | VI   | 1.3582  | 1.7435   | 1.7354   | 1.7321   | 1.7329   | 1.7384   | 1.7247   | 1.7391   | 1.7405   | 1.3989  | 1.3559  | 0.73605              |
|                                                                                       | VII  | 1.3577  | 1.734    | 1.7372   | 1.7293   | 1.7255   | 1.728    | 1.7262   | 1.732    | 1.7356   | 1.4004  | 1.3582  | 0.72495              |
|                                                                                       | VIII | 1.3577  | 1.734    | 1.7372   | 1.7293   | 1.7255   | 1.728    | 1.7262   | 1.732    | 1.7356   | 1.4004  | 1.3582  | 0.72495              |

## References

- 
- <sup>1</sup> Oliveira, S.; Ministro, J.; Santos, I.C.; Belo, D.; Lopes, E.B.; Rabaça, S.; Canadell, E.; Almeida, M. Bilayer Molecular Metals Based on Dissymmetrical Electron Donors. *Inorg. Chem.* **2015**, *54*, 6677–6679.
- <sup>2</sup> Bruker AXS: SAINT+, release 6.22; Bruker Analytical Systems:Madison, WI, 2005.
- <sup>3</sup> Bruker AXS: SADABS; Bruker Analytical Systems: Madison, WI, 2005
- <sup>4</sup> Altomare, A.; Burla, M.C.; Camalli, M.; Cascarano, G.; Giacovazzo, G.; Guagliardi, A.; Moliterni, A.G.G.; Polidori, G.; Spagna, R. *J. Appl. Crystallogr.* **1999**, *32*, 115-119.
- <sup>5</sup> Sheldrick, G. M. Sheldrick, G.M. *Acta Cryst.* **2008**, *A64*, 112-122.
- <sup>6</sup> Sheldrick, G. M. Crystal structure refinement with SHELXL. *Acta Crystallogr., Sect. C: Struct. Chem.* **2015**, *71*, 3–8.
- <sup>7</sup> Farrugia L.J.; WingX-v2014.1 *J. Appl. Cryst.* **2012**, *45*, 849-854.
- <sup>8</sup> Macrae, C. F.; Bruno, I. J.; Chisholm, J. A.; Edgington, P. R.; McCabe, P.; Pidcock, E.; Rodriguez-Monge, L.; Taylor, R.; van de Streek, J.; Wood, P. A. Mercury CSD 2.0 - new features for the visualization and investigation of crystal structures. *J. Appl. Crystallogr.* **2008**, *41*, 466–470.
- <sup>9</sup> Gaussian 09, Revision A.02, Frisch, M. J.; Trucks, G. W.; Schlegel, H. B.; Scuseria, G. E.; Robb, M. A.; Cheeseman, J. R.; Scalmani, G.; Barone, V.; Mennucci, B.; Petersson, G. A.; Nakatsuji, H.; Caricato, M.; Li, X.; Hratchian, H. P.; Izmaylov, A. F.; Bloino, J.; Zheng, G.; Sonnenberg, J. L.; Hada, M.; Ehara, M.; Toyota, K.; Fukuda, R.; Hasegawa, J.; Ishida, M.; Nakajima, T.; Honda, Y.; Kitao, O.; Nakai, H.; Vreven, T.; Montgomery, Jr., J. A.; Peralta, J. E.; Ogliaro, F.; Bearpark, M.; Heyd, J. J.; Brothers, E.; Kudin, K. N.; Staroverov, V. N.; Kobayashi, R.; Normand, J.; Raghavachari, K.; Rendell, A.; Burant, J. C.; Iyengar, S. S.; Tomasi, J.; Cossi, M.; Rega, N.; Millam, J. M.; Klene, M.; Knox, J. E.; Cross, J. B.; Bakken, V.; Adamo, C.; Jaramillo, J.; Gomperts, R.; Stratmann, R. E.; Yazyev, O.; Austin, A. J.; Cammi, R.; Pomelli, C.; Ochterski, J. W.; Martin, R. L.; Morokuma, K.; Zakrzewski, V. G.; Voth, G. A.; Salvador, P.; Dannenberg, J. J.; Dapprich, S.; Daniels, A. D.; Farkas, Ö.; Foresman, J. B.; Ortiz, J. V.; Cioslowski, J.; Fox, D. J. Gaussian, Inc., Wallingford CT, **2009**.
- <sup>10</sup> (a) Ditchfield, R.; Hehre, W. J.; Pople, J. A. *J. Chem. Phys.* **1971**, *54*, 724-728. (b) Hehre, W. J.; Ditchfield, R.; Pople, J. A. *J. Chem. Phys.* **1972**, *56*, 2257-2261. (c) Hariharan, P. C.; Pople, J. A. *Mol. Phys.* **1974**, *27*, 209-214. (d) Gordon, M. S. *Chem. Phys. Lett.* **1980**, *76*, 163-168. (e) Hariharan, P. C.; Pople, J. A. *Theor. Chim. Acta* **1973**, *28*, 213-222.
- <sup>11</sup> Hehre, W. J.; Radom, L.; Schleyer, P. v.R. & Pople, J. A. *Ab Initio Molecular Orbital Theory*, John Wiley & Sons, NY, 1986.
- <sup>12</sup> Parr, R. G. & Yang, W. in *Density Functional Theory of Atoms and Molecules*; Oxford University Press: New York, 1989.

---

<sup>13</sup> (a) Perdew, J. P.; Burke, K.; Ernzerhof, M. *Phys. Rev. Lett.* **1997**, *78*, 1396. (b) Perdew, J. P. *Phys. Rev. B* **1986**, *33*, 8822.

<sup>14</sup> (a) McClean, A. D.; Chandler, G. S. *J. Chem. Phys.* **1980**, *72*, 5639-5648. (b) Krishnan, R.; Binkley, J. S.; Seeger, R. Pople, J. A. *J. Chem. Phys.* **1980**, *72*, 650-654. (c) Wachters, A. J. H. *J. Chem. Phys.* **1970**, *52*, 1033-1036. (d) Hay, P. J. *J. Chem. Phys.* **1977**, *66*, 4377-4384. (e) Raghavachari, K.; Trucks, G. W. *J. Chem. Phys.* **1989**, *91*, 1062-1065. (f) Binning Jr., R. C.; Curtiss, L. A. *J. Comp. Chem.* **1990**, *11*, 1206-1216. (g) McGrath, M. P.; Radom, L. *J. Chem. Phys.* **1991**, *94*, 511-516. (h) Clark, T.; Chandrasekhar, J.; Spitznagel, G. W.; Schleyer, P. v. R. *J. Comp. Chem.* **1983**, *4*, 294-301. (i) Frisch, M. J.; Pople, J. A.; Binkley, J. S. *J. Chem. Phys.* **1984**, *80*, 3265-3269.

<sup>15</sup> Zhao, Y.; Truhlar, D. G. *Theor. Chem. Acc.*, **2008**, *120*, 215-241.

<sup>16</sup> (a) Zhao, Y.; Truhlar, D. G. *Acc. Chem. Res.* **2008**, *41*, 157-167. (b) Zhao, Y.; Truhlar, D.G. *Chem. Phys. Lett.* **2011**, *502*, 1-13.

<sup>17</sup> C. Fiolhais, F. Nogueira, and M. A. L. Marques. *A Primer in Density Functional Theory. Lecture Notes in Physics 620*, Springer, 2003.

<sup>18</sup> Kresse, G.; Hafner, J. Ab initio molecular dynamics for liquid metals. *Phys. Rev. B* **1993**, *47*, 558-561.

<sup>19</sup> Kresse, G.; Hafner, J. Ab Initio Molecular-Dynamics Simulation of the Liquid-Metal- Amorphous-Semiconductor Transition in Germanium. *Phys. Rev. B* **1994**, *49*, 14251-14269..

<sup>20</sup> Kresse, G.; Furthmüller, J. Efficiency of Ab-initio Total Energy Calculations for Metals and Semiconductors Using a Plane-Wave Basis Set. *Computational Materials Science* **1996**, *6*, 15-50.

<sup>21</sup> Kresse, G.; Furthmüller, J. Efficient Iterative Schemes for Ab initio Total-Energy Calculations Using a Plane-Wave Basis Set. *Phys. Rev. B* **1996**, *54* 11169-11186.

<sup>22</sup> J. P. Perdew, K. Burke, and M. Ernzerhof. Generalized Gradient Approximation Made Simple. *Phys. Rev. Lett.* **1996**, *77*, 3865-3868; erratum *Phys. Rev. Lett.* **1997**, *78* 1396.

<sup>23</sup> Sun, J.; Ruzsinszky, A.; Perdew, J. P. Strongly Constrained and Appropriately Normed Semilocal Density Functional. *Phys. Rev. Lett.* **2015**, *115*, 036402

<sup>24</sup> Sun, J.; Remsing, R. C.; Zhang, Y.; Sun, Z.; Ruzsinszky, A.; Peng, H.; Yang, Z.; Paul, A.; Waghmare, U.; Wu, X.; Klein, M. L.; Perdew, J. P. Accurate First-Principles Structures and Energies of Diversely Bonded Systems from an Efficient Density Functional. *Nature Chemistry* **2016**, *8*, 831-836.

<sup>25</sup> Tkatchenko, A.; Scheffler, M. Accurate Molecular Van Der Waals Interactions from Ground-State Electron Density and Free-Atom Reference Data. *Phys. Rev. Lett.* **2009**, *102*, 073005.

<sup>26</sup> Bučko, T.; Lebègue, S.; Hafner, J.; Ángyán, J. G. Improved Density Dependent Correction for the Description of London Dispersion Forces. *J. Chem. Theory Comput.* **2013**, *9*, 4293-4299.

---

<sup>27</sup> Bučko, T.; Lebègue, S.; Ángyán, J. G.; Hafner, J. Extending the Applicability of the Tkatchenko-Scheffler Dispersion Correction Via Iterative Hirshfeld Partitioning. *J. Chem. Phys.* **2014**, 141, 034114.

<sup>28</sup> Blöchl, P. E. Projector Augmented-Wave Method. *Phys. Rev. B* **1994**, 50, 17953-17979.

<sup>29</sup> Kresse, G.; Joubert, D. From Ultrasoft Pseudopotentials to the Projector Augmented- Wave Method. *Phys. Rev. B* **1999**, 59 1758-1775.
